# Supplementary material for: Array of Miniaturized Amperometric Gas Sensors Using Atomic Gold Decorated Pt/PANI Electrodes in Room Temperature Ionic Liquid Films
Source: MDPI journal article supplement (doi:10.3390/s23084132), 2023-04-20

## **#Supplementary File**

# **Array of Miniaturized Amperometric Gas Sensors Using Atomic Gold Decorated Pt/PANI Electrodes in Room Temperature Ionic Liquid Films**

Anifatul Faricha <sup>1</sup>, Shohei Yoshida <sup>2</sup>, Parthojit Chakraborty <sup>3</sup>, Keisuke Okamoto <sup>2</sup>, Tso-Fu Mark Chang <sup>3</sup>, Masato Sone <sup>3</sup>, Takamichi Nakamoto <sup>1, 3\*</sup>

<sup>1</sup> Department of Information and Communications Engineering, Tokyo Institute of Technology, 226-8503, Kanagawa, Japan

<sup>2</sup> Department of Materials Science and Engineering, Tokyo Institute of Technology, 226-8503, Kanagawa, Japan

<sup>3</sup> Institute of Innovative Research, Tokyo Institute of Technology, 226-8503, Kanagawa, Japan

\*Correspondence: nakamoto.t.ab@m.titech.ac.jp

Lists of supplementary information files:

**S1** : The reproducibility of Au<sub>2</sub> clusters decorated Pt/PANI using 3 different IDA electrodes

**S2** : The data applying two different modified IDAs (using Pt/PANI/Au<sub>2</sub> as representative) with the same RTIL

**S3** : The raw data for Table 4

**S4**: Schemes of our experimental set up and experiments performed in this research study

**S1** : The reproducibility of Au<sub>2</sub> clusters decorated Pt/PANI using 3 different IDA electrodes

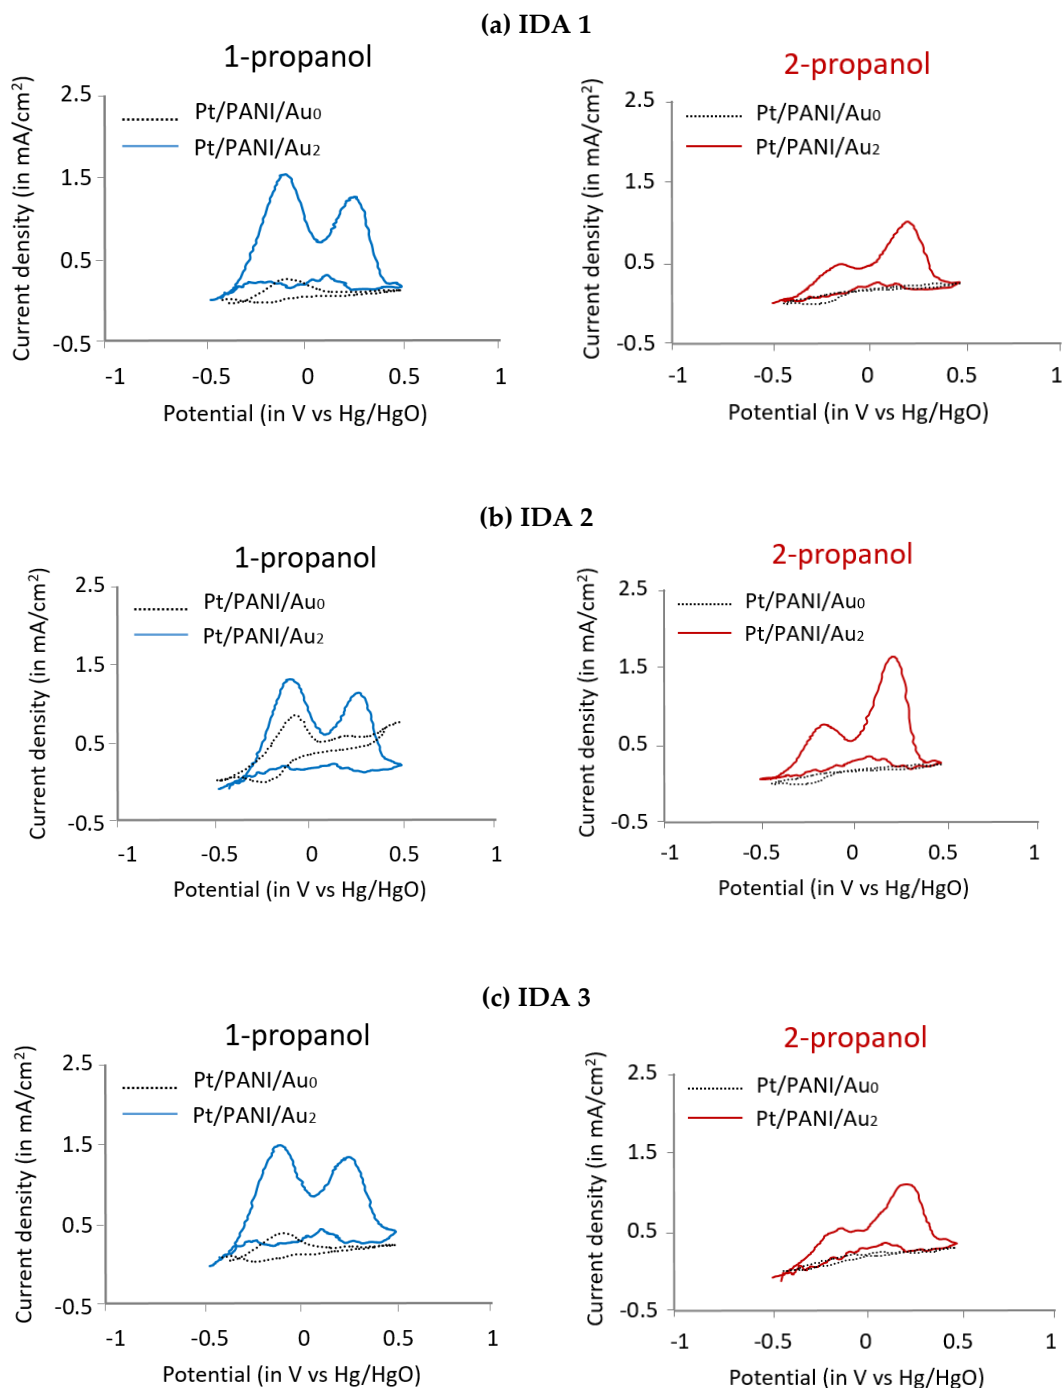

**Figure S1.** The comparison of electrooxidation from propanol isomers using Pt/PANI/Au<sub>2</sub> and Pt/PANI/Au<sub>0</sub> generated from 3 different IDA electrodes: (a) IDA 1; (b) IDA 2; (c) IDA 3.

**S2** : The data applying two different modified IDAs (using Pt/PANI/Au<sub>2</sub> as representative) with the same RTIL

**Modified WE** : Pt/PANI/Au<sub>2</sub>

**RTIL** : [EMIM][Ac]

**RC** : 100%

| <i>Es</i> against<br>Ag/AgCl<br>(V) | Analyte    | Mean in mA/cm <sup>2</sup>                      |          |
|-------------------------------------|------------|-------------------------------------------------|----------|
|                                     |            | <i>standard deviation</i> in mA/cm <sup>2</sup> |          |
|                                     |            | IDA 1                                           | IDA 2    |
| +0.25                               | 1-butanol  | 7.1                                             | 7.4      |
|                                     |            | 0.1                                             | 0.141421 |
|                                     | Isobutanol | 7.233                                           | 7.25     |
|                                     |            | 0.0577                                          | 0.3535   |
|                                     | 2-butanol  | 6.9                                             | 6.55     |
|                                     |            | 0.1                                             | 0.777    |
| +0.5                                | 1-butanol  | 8.5                                             | 8.15     |
|                                     |            | 0.5                                             | 0.212    |
|                                     | Isobutanol | 10.33                                           | 10.55    |
|                                     |            | 0.577                                           | 0.636    |
|                                     | 2-butanol  | 6.76                                            | 7.05     |
|                                     |            | 0.580                                           | 0.0707   |
| +0.9                                | 1-butanol  | 3.9                                             | 4.05     |
|                                     |            | 0.3605                                          | 0.007    |
|                                     | Isobutanol | 5.13                                            | 6.1      |
|                                     |            | 0.814                                           | 0.14     |
|                                     | 2-butanol  | 4.05                                            | 4        |
|                                     |            | 0.3905                                          | 0.0001   |

\* data from IDA 1 and IDA 2 were from 3 and 2 repeated measurements, respectively

Modified WE : Pt/PANI/Au<sub>2</sub>

RTIL : [EMIM][Otf]

RC : 100%

| <i>Es</i> against<br>Ag/AgCl<br>(V) | Analyte    | Mean in mA/cm <sup>2</sup>                      |         |
|-------------------------------------|------------|-------------------------------------------------|---------|
|                                     |            | <i>standard deviation</i> in mA/cm <sup>2</sup> |         |
|                                     |            | IDA 1                                           | IDA 2   |
| +0.25                               | 1-butanol  | 4.667                                           | 4.5     |
|                                     |            | 1.527                                           | 2.12    |
|                                     | Isobutanol | 2.667                                           | 3       |
|                                     |            | 0.577                                           | 0.707   |
|                                     | 2-butanol  | 2.667                                           | 2       |
|                                     |            | 0.288                                           | 0.0001  |
| +0.5                                | 1-butanol  | 3                                               | 2.25    |
|                                     |            | 1.3228                                          | 0.3535  |
|                                     | Isobutanol | 0.833                                           | 0.5     |
|                                     |            | 0.288                                           | 0.001   |
|                                     | 2-butanol  | 1.333                                           | 1.25    |
|                                     |            | 0.577                                           | 0.3535  |
| +1                                  | 1-butanol  | 2                                               | 1.5     |
|                                     |            | 1                                               | 0.707   |
|                                     | Isobutanol | 0.6                                             | 0.5     |
|                                     |            | 0.173                                           | 0.001   |
|                                     | 2-butanol  | 0.766                                           | 0.5     |
|                                     |            | 0.288                                           | 0.00002 |

\* data from IDA 1 and IDA 2 were from 3 and 2 repeated measurements, respectively

Modified WE : Pt/PANI/Au<sub>2</sub>

RTIL : [EMIM][Cl]

RC : 100%

| <i>Es</i> against<br>Ag/AgCl<br>(V) | Analyte    | Mean in mA/cm <sup>2</sup>                      |                  |
|-------------------------------------|------------|-------------------------------------------------|------------------|
|                                     |            | <i>standard deviation</i> in mA/cm <sup>2</sup> |                  |
|                                     |            | IDA 1                                           | IDA 2            |
| +0.25                               | 1-butanol  | 5                                               | 5                |
|                                     |            | <i>1.6667</i>                                   | <i>2.357</i>     |
|                                     | Isobutanol | 10                                              | 10               |
|                                     |            | <i>1.667</i>                                    | <i>2.357</i>     |
|                                     | 2-butanol  | 1.611                                           | 1.79             |
|                                     |            | <i>0.1575</i>                                   | <i>0.1296</i>    |
| +0.5                                | 1-butanol  | 3.222                                           | 3.25             |
|                                     |            | <i>0.19245</i>                                  | <i>0.117</i>     |
|                                     | Isobutanol | 4.111                                           | 3.708            |
|                                     |            | <i>0.09622</i>                                  | <i>0.5303</i>    |
|                                     | 2-butanol  | 0.00001                                         | 0.0000003        |
|                                     |            | <i>0.0000001</i>                                | <i>0.0000001</i> |
| +1                                  | 1-butanol  | 3.22                                            | 3.25             |
|                                     |            | <i>0.19245</i>                                  | <i>0.11785</i>   |
|                                     | Isobutanol | 4.11                                            | 3.7083           |
|                                     |            | <i>0.09622</i>                                  | <i>0.5303</i>    |
|                                     | 2-butanol  | 0.0000001                                       | 0.0000001        |
|                                     |            | <i>0.0000001</i>                                | <i>0.0000001</i> |

\* data from IDA 1 and IDA 2 were from 3 and 2 repeated measurements, respectively

S3 : The raw data for Table 4

IDA : Pt/PANI/Au<sub>2</sub>

RTIL : [EMIM][Ac]

| <i>Es</i> against<br>Ag/AgCl<br>(V) | Analyte    | Mean in mA/cm <sup>2</sup>                      |          |          |          |          |
|-------------------------------------|------------|-------------------------------------------------|----------|----------|----------|----------|
|                                     |            | <i>standard deviation</i> in mA/cm <sup>2</sup> |          |          |          |          |
|                                     |            | 0% RC                                           | 25% RC   | 50% RC   | 75% RC   | 100% RC  |
| +0.25                               | 1-butanol  | 0                                               | 0.5      | 3.042    | 6.0404   | 7.22     |
|                                     |            | 0                                               | 0.015811 | 0.113225 | 0.151858 | 0.192354 |
|                                     | Isobutanol | 0                                               | 0.5      | 2.592    | 6.566    | 7.24     |
|                                     |            | 0                                               | 0.015811 | 0.074632 | 0.084735 | 0.181659 |
|                                     | 2-butanol  | 0                                               | 0.0986   | 0.0986   | 0.0986   | 6.76     |
|                                     |            | 0                                               | 0.014993 | 0.014993 | 0.014993 | 0.439318 |
| +0.5                                | 1-butanol  | 0                                               | 0.956    | 2.28     | 7.006    | 8.36     |
|                                     |            | 0                                               | 0.092898 | 0.192354 | 0.071274 | 0.415933 |
|                                     | Isobutanol | 0                                               | 0.956    | 8.18     | 9.072    | 10.42    |
|                                     |            | 0                                               | 0.092898 | 0.216795 | 0.08167  | 0.531037 |
|                                     | 2-butanol  | 0                                               | 0.956    | 0.954    | 6.126    | 6.88     |
|                                     |            | 0                                               | 0.092898 | 0.094763 | 0.212791 | 0.56952  |
| +0.9                                | 1-butanol  | 0                                               | 0.956    | 2.356    | 2.356    | 3.96     |
|                                     |            | 0                                               | 0.092898 | 0.202312 | 0.202312 | 0.270185 |
|                                     | Isobutanol | 0                                               | 2.776    | 3.49     | 3.49     | 5.52     |
|                                     |            | 0                                               | 0.043932 | 0.074162 | 0.074162 | 0.785493 |
|                                     | 2-butanol  | 0                                               | 0.956    | 3.47     | 3.47     | 4.03     |
|                                     |            | 0                                               | 0.092898 | 0.044721 | 0.044721 | 0.277489 |

IDA : Pt/PANI/Au<sub>0</sub>

RTIL : [EMIM][Ac]

| <i>Es</i> against<br>Ag/AgCl<br>(V) | Analyte    | Mean in mA/cm <sup>2</sup>                      |             |             |             |             |
|-------------------------------------|------------|-------------------------------------------------|-------------|-------------|-------------|-------------|
|                                     |            | <i>standard deviation</i> in mA/cm <sup>2</sup> |             |             |             |             |
|                                     |            | 0% RC                                           | 25% RC      | 50% RC      | 75% RC      | 100% RC     |
| +0.25                               | 1-butanol  | 0                                               | 0.0986      | 0.0986      | 0.1018      | 1.6         |
|                                     |            | 0                                               | 0.014993332 | 0.014993332 | 0.011054411 | 0.547722558 |
|                                     | Isobutanol | 0                                               | 0.0986      | 0.0986      | 0.0986      | 1.7         |
|                                     |            | 0                                               | 0.014993332 | 0.014993332 | 0.014993332 | 0.447213595 |
|                                     | 2-butanol  | 0                                               | 0.0986      | 0.0986      | 0.0986      | 1.12        |
|                                     |            | 0                                               | 0.014993332 | 0.014993332 | 0.014993332 | 0.216794834 |
| +0.5                                | 1-butanol  | 0                                               | 0.954       | 0.954       | 0.954       | 1.34        |
|                                     |            | 0                                               | 0.094762862 | 0.094762862 | 0.094762862 | 0.207364414 |
|                                     | Isobutanol | 0                                               | 0.956       | 0.956       | 0.956       | 2.24        |
|                                     |            | 0                                               | 0.092897793 | 0.092897793 | 0.092897793 | 0.450555213 |
|                                     | 2-butanol  | 0                                               | 0.956       | 0.956       | 0.956       | 0.974       |
|                                     |            | 0                                               | 0.092897793 | 0.092897793 | 0.092897793 | 0.043358967 |
| +0.9                                | 1-butanol  | 0                                               | 0.956       | 0.956       | 0.956       | 1.6         |
|                                     |            | 0                                               | 0.092897793 | 0.092897793 | 0.092897793 | 0.547722558 |
|                                     | Isobutanol | 0                                               | 0.956       | 0.956       | 0.956       | 1.7         |
|                                     |            | 0                                               | 0.092897793 | 0.092897793 | 0.092897793 | 0.447213595 |
|                                     | 2-butanol  | 0                                               | 0.956       | 0.956       | 0.956       | 1.12        |
|                                     |            | 0                                               | 0.092897793 | 0.092897793 | 0.092897793 | 0.216794834 |

IDA : Pt/PANI/Au<sub>2</sub>

RTIL : [EMIM][Otf]

| <i>Es</i> against<br>Ag/AgCl<br>(V) | Analyte    | Mean in mA/cm <sup>2</sup>                      |          |          |          |          |
|-------------------------------------|------------|-------------------------------------------------|----------|----------|----------|----------|
|                                     |            | <i>standard deviation</i> in mA/cm <sup>2</sup> |          |          |          |          |
|                                     |            | 0% RC                                           | 25% RC   | 50% RC   | 75% RC   | 100% RC  |
| +0.25                               | 1-butanol  | 0                                               | 1.918    | 2.76     | 3.46     | 4.6      |
|                                     |            | 0                                               | 0.08438  | 0.43359  | 0.841427 | 1.516575 |
|                                     | Isobutanol | 0                                               | 1.59     | 2.39     | 2.66     | 2.8      |
|                                     |            | 0                                               | 0.654217 | 0.219089 | 0.4219   | 0.570088 |
|                                     | 2-butanol  | 0                                               | 1.154    | 1.94     | 2.37     | 2.4      |
|                                     |            | 0                                               | 0.086487 | 0.089443 | 0.21095  | 0.41833  |
| +0.5                                | 1-butanol  | 0                                               | 0.94     | 0.94     | 2        | 2.7      |
|                                     |            | 0                                               | 0.089443 | 0.089443 | 0.070711 | 1.036822 |
|                                     | Isobutanol | 0                                               | 0.94     | 0.94     | 0.94     | 1        |
|                                     |            | 0                                               | 0.089443 | 0.089443 | 0.089443 | 0.273861 |
|                                     | 2-butanol  | 0                                               | 0.94     | 0.94     | 0.94     | 1.3      |
|                                     |            | 0                                               | 0.089443 | 0.089443 | 0.089443 | 0.447214 |
| +1                                  | 1-butanol  | 0                                               | 0.47     | 0.47     | 0.47     | 1.8      |
|                                     |            | 0                                               | 0.044721 | 0.044721 | 0.044721 | 0.83666  |
|                                     | Isobutanol | 0                                               | 0.391    | 0.391    | 0.391    | 0.56     |
|                                     |            | 0                                               | 0.008944 | 0.008944 | 0.008944 | 0.134164 |
|                                     | 2-butanol  | 0                                               | 0.391    | 0.47     | 0.47     | 0.66     |
|                                     |            | 0                                               | 0.008944 | 0.044721 | 0.044721 | 0.250998 |



IDA : Pt/PANI/Au<sub>0</sub>

RTIL : [EMIM][Otf]

| <i>Es</i> against<br>Ag/AgCl<br>(V) | Analyte    | Mean in mA/cm <sup>2</sup>                      |        |        |        |           |
|-------------------------------------|------------|-------------------------------------------------|--------|--------|--------|-----------|
|                                     |            | <i>standard deviation</i> in mA/cm <sup>2</sup> |        |        |        |           |
|                                     |            | 0% RC                                           | 25% RC | 50% RC | 75% RC | 100% RC   |
| +0.25                               | 1-butanol  | 0                                               | 0      | 0      | 0      | 0.0000001 |
|                                     |            | 0                                               | 0      | 0      | 0      | 0.0000001 |
|                                     | Isobutanol | 0                                               | 0      | 0      | 0      | 0.0000001 |
|                                     |            | 0                                               | 0      | 0      | 0      | 0.0000001 |
|                                     | 2-butanol  | 0                                               | 0      | 0      | 0      | 0.0000001 |
|                                     |            | 0                                               | 0      | 0      | 0      | 0.0000001 |
| +0.5                                | 1-butanol  | 0                                               | 0      | 0      | 0      | 0.0000001 |
|                                     |            | 0                                               | 0      | 0      | 0      | 0.0000001 |
|                                     | Isobutanol | 0                                               | 0      | 0      | 0      | 0.0000001 |
|                                     |            | 0                                               | 0      | 0      | 0      | 0.0000001 |
|                                     | 2-butanol  | 0                                               | 0      | 0      | 0      | 0.0000001 |
|                                     |            | 0                                               | 0      | 0      | 0      | 0.0000001 |
| +1                                  | 1-butanol  | 0                                               | 0      | 0      | 0      | 0.0000001 |
|                                     |            | 0                                               | 0      | 0      | 0      | 0.0000001 |
|                                     | Isobutanol | 0                                               | 0      | 0      | 0      | 0.0000001 |
|                                     |            | 0                                               | 0      | 0      | 0      | 0.0000001 |
|                                     | 2-butanol  | 0                                               | 0      | 0      | 0      | 0.0000001 |
|                                     |            | 0                                               | 0      | 0      | 0      | 0.0000001 |

\* Three different IDAs were used to check on different days, all three different IDAs showed the same response, and there were no signals of analyte obtained

IDA : Pt/PANI/Au<sub>2</sub>

RTIL : [EMIM][Cl]

| <i>Es</i> against<br>Ag/AgCl<br>(V) | Analyte    | Mean in mA/cm <sup>2</sup>                      |          |                 |                 |                  |
|-------------------------------------|------------|-------------------------------------------------|----------|-----------------|-----------------|------------------|
|                                     |            | <i>standard deviation</i> in mA/cm <sup>2</sup> |          |                 |                 |                  |
|                                     |            | 0% RC                                           | 25% RC   | 50% RC          | 75% RC          | 100% RC          |
| +0.25                               | 1-butanol  | 0                                               | 0        | 0.786667        | 3.196667        | 5                |
|                                     |            | <i>0</i>                                        | <i>0</i> | <i>0.069121</i> | <i>0.140633</i> | <i>1.666667</i>  |
|                                     | Isobutanol | 0                                               | 0        | 1.596667        | 4.733333        | 10               |
|                                     |            | <i>0</i>                                        | <i>0</i> | <i>0.096032</i> | <i>0.383695</i> | <i>1.666667</i>  |
|                                     | 2-butanol  | 0                                               | 0        | 0               | 0               | 1.596667         |
|                                     |            | <i>0</i>                                        | <i>0</i> | <i>0</i>        | <i>0</i>        | <i>0.096032</i>  |
| +0.5                                | 1-butanol  | 0                                               | 0        | 1.596667        | 2.15            | 3.233333         |
|                                     |            | <i>0</i>                                        | <i>0</i> | <i>0.096032</i> | <i>0.442531</i> | <i>0.149071</i>  |
|                                     | Isobutanol | 0                                               | 0        | 1.5             | 3.7             | 3.9              |
|                                     |            | <i>0</i>                                        | <i>0</i> | <i>0.096032</i> | <i>0.401386</i> | <i>0.31</i>      |
|                                     | 2-butanol  | 0                                               | 0        | 0               | 0               | 0.0000003        |
|                                     |            | <i>0</i>                                        | <i>0</i> | <i>0</i>        | <i>0</i>        | <i>0.0000001</i> |
| +1                                  | 1-butanol  | 0                                               | 0        | 1.596667        | 2.15            | 3.233333         |
|                                     |            | <i>0</i>                                        | <i>0</i> | <i>0.096032</i> | <i>0.442531</i> | <i>0.149071</i>  |
|                                     | Isobutanol | 0                                               | 0        | 1.596667        | 3.766667        | 3.95             |
|                                     |            | <i>0</i>                                        | <i>0</i> | <i>0.096032</i> | <i>0.401386</i> | <i>0.381584</i>  |
|                                     | 2-butanol  | 0                                               | 0        | 0               | 0               | 0.0000001        |
|                                     |            | <i>0</i>                                        | <i>0</i> | <i>0</i>        | <i>0</i>        | <i>0.0000001</i> |

IDA : Pt/PANI/Au<sub>0</sub>

RTIL : [EMIM][Cl]

| <i>Es</i> against<br>Ag/AgCl<br>(V) | Analyte    | Mean in mA/cm <sup>2</sup>                      |        |          |          |           |
|-------------------------------------|------------|-------------------------------------------------|--------|----------|----------|-----------|
|                                     |            | <i>standard deviation</i> in mA/cm <sup>2</sup> |        |          |          |           |
|                                     |            | 0% RC                                           | 25% RC | 50% RC   | 75% RC   | 100% RC   |
| +0.25                               | 1-butanol  | 0                                               | 0      | 0.7      | 4        | 3.233333  |
|                                     |            | 0                                               | 0      | 0.069121 | 5.907387 | 0.149071  |
|                                     | Isobutanol | 0                                               | 0      | 4.266667 | 4.733333 | 7.466667  |
|                                     |            | 0                                               | 0      | 5.907387 | 0.383695 | 0.87718   |
|                                     | 2-butanol  | 0                                               | 0      | 0        | 0        | 0.0000001 |
|                                     |            | 0                                               | 0      | 0        | 0        | 0.000001  |
| +0.5                                | 1-butanol  | 0                                               | 0      | 1.596667 | 2.15     | 3.33333   |
|                                     |            | 0                                               | 0      | 0.096032 | 0.442531 | 0.15      |
|                                     | Isobutanol | 0                                               | 0      | 1.596667 | 3.766667 | 3.95      |
|                                     |            | 0                                               | 0      | 0.096032 | 0.401386 | 0.3       |
|                                     | 2-butanol  | 0                                               | 0      | 0        | 0        | 0.0000001 |
|                                     |            | 0                                               | 0      | 0        | 0        | 0.000001  |
| +1                                  | 1-butanol  | 0                                               | 0      | 1.596667 | 2.15     | 3.2       |
|                                     |            | 0                                               | 0      | 0.096032 | 0.442531 | 0.149     |
|                                     | Isobutanol | 0                                               | 0      | 1.5      | 3.7      | 3.9       |
|                                     |            | 0                                               | 0      | 0.09     | 0.40     | 0.351584  |
|                                     | 2-butanol  | 0                                               | 0      | 0        | 0        | 0.0000001 |
|                                     |            | 0                                               | 0      | 0        | 0        | 0.000001  |

**S4:** Schemes of our experimental set up and experiments performed in this research study

### I. Sensor fabrication

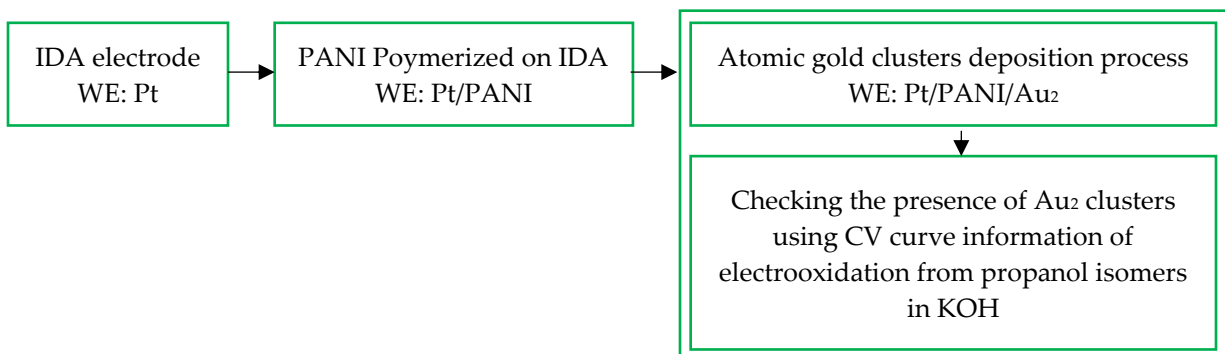

### II. Butanol isomers gas measurements

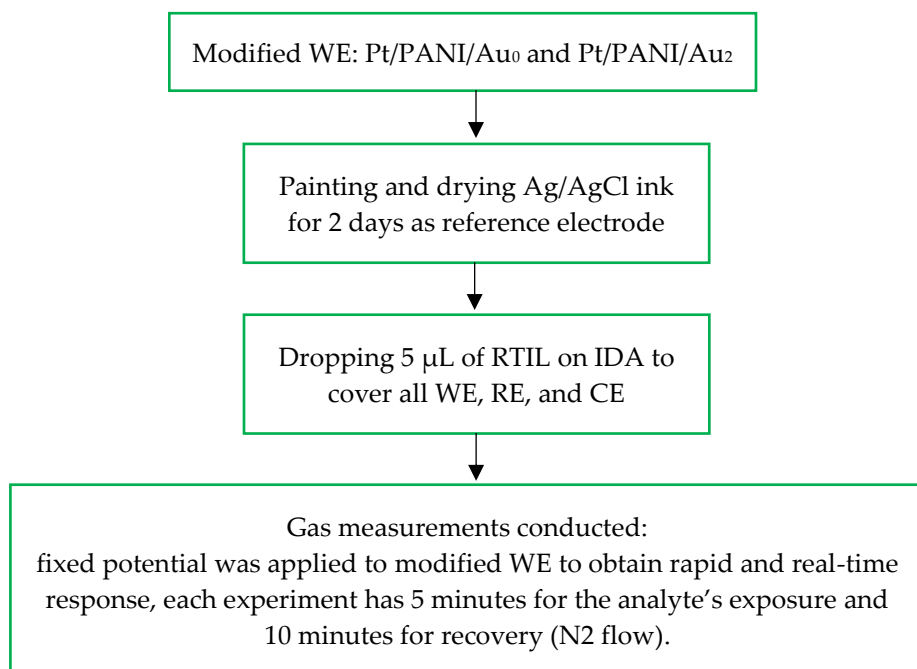

Supplement: s1 [file s1]
